# Supplementary material for: Tuning of structural and optical properties with enhanced catalytic activity in chemically synthesized Co-doped MoS2 nanosheets
Source: Royal Society of Chemistry journal article supplement (doi:10.1039/d0ra08229e), 2021-01-01
Supplement: d0ra08229e1.pdf [file d0ra08229e1.pdf]

## Supporting Information

### Tuning of Structural and Optical Properties with Enhanced Catalytic Activity in Chemically Synthesized Co-Doped MoS<sub>2</sub> Nanosheets

Rosy Rahman<sup>1</sup>, Dipanjan Samanta<sup>2</sup>, Amita Pathak<sup>2\*</sup> and Tapan Kumar Nath<sup>1\*</sup>

<sup>1</sup>Department of Physics, Indian Institute of Technology Kharagpur, W.B., 721302, India

<sup>2</sup>Department of Chemistry, Indian Institute of Technology Kharagpur, W.B., 721302, India

#### 1. AFM Image Analysis

The films of undoped and 6% Co doped MoS<sub>2</sub> were deposited on SiO<sub>2</sub>/Si substrate by spin coating (3000 rpm, 1 min) and the images of the film were recorded in non-contact mode. The lateral dimension of each particle is 0.15 μm and 0.05 μm of undoped and 6% Co doped MoS<sub>2</sub>, respectively as obtained from height profile distribution curve.

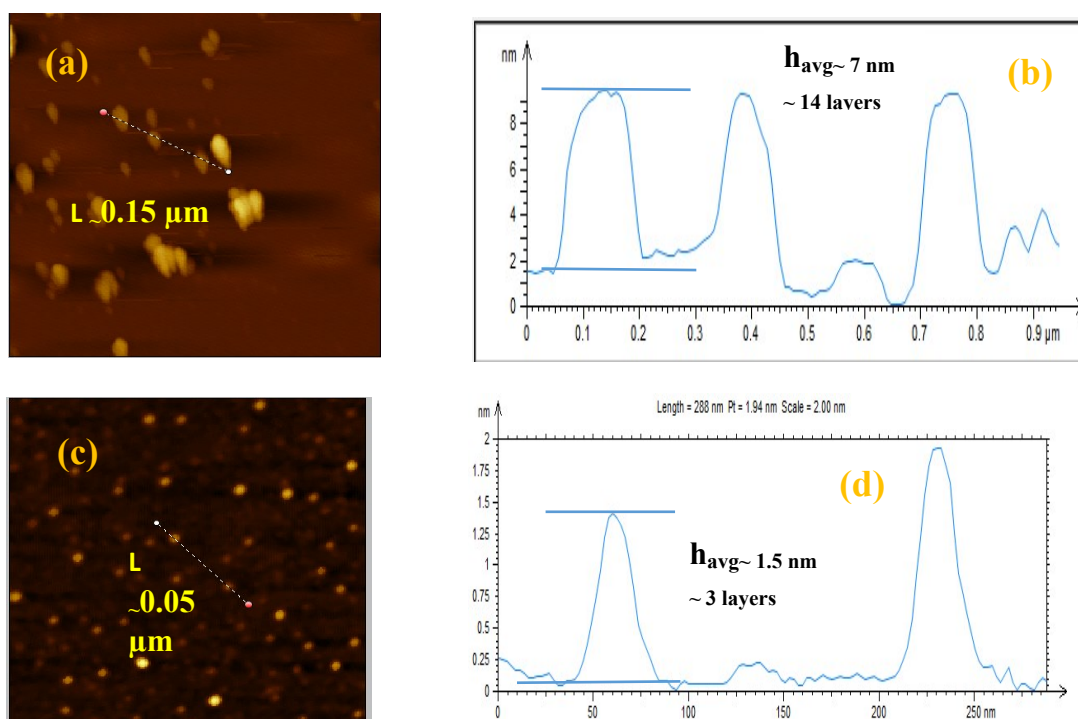

Figure S1: Tapping mode (a), (c); (b), (d) height profile distribution of undoped and 6% Co doped MoS<sub>2</sub> in AFM

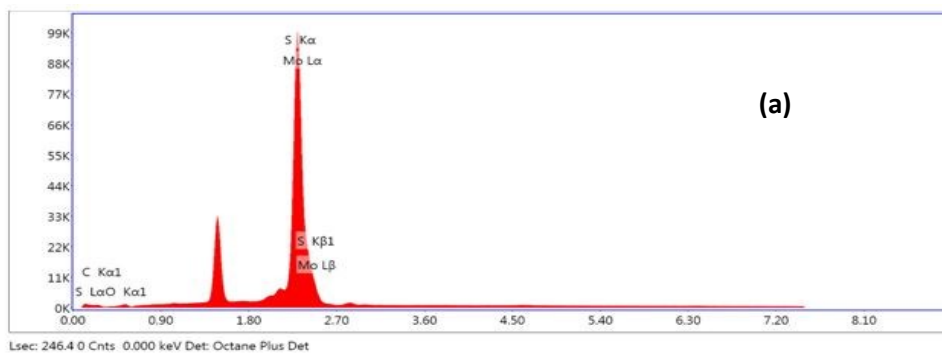

**eZAF Smart Quant Results**

| Element | Weight % | Atomic % | Net Int. | Error % | Kratio | Z    | R    | A    | F    |
|---------|----------|----------|----------|---------|--------|------|------|------|------|
| C K     | 4.96     | 20.46    | 35.7     | 11.82   | 0.01   | 1.37 | 0.81 | 0.10 | 1.00 |
| O K     | 0.14     | 0.43     | 2.4      | 64.35   | 0.00   | 1.31 | 0.84 | 0.13 | 1.00 |
| MoL     | 65.59    | 33.85    | 3836.9   | 2.05    | 0.62   | 0.90 | 1.07 | 1.04 | 1.01 |
| S K     | 29.30    | 45.25    | 3430     | 2.39    | 0.32   | 1.17 | 0.92 | 0.92 | 1.01 |

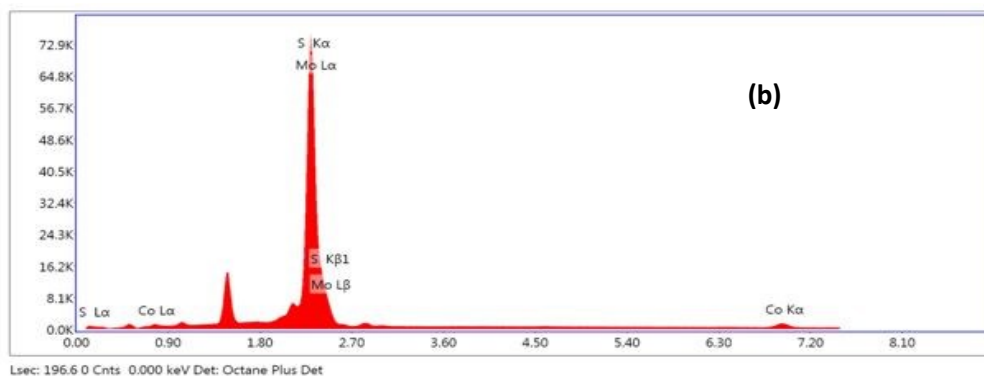

**eZAF Smart Quant Results**

| Element | Weight % | Atomic % | Net Int. | Error % | Kratio | Z    | R    | A    | F    |
|---------|----------|----------|----------|---------|--------|------|------|------|------|
| MoL     | 66.03    | 41.32    | 3878.5   | 1.77    | 0.63   | 0.92 | 1.06 | 1.02 | 1.01 |
| S K     | 28.20    | 52.80    | 2960.7   | 2.67    | 0.28   | 1.21 | 0.90 | 0.90 | 1.01 |
| CoK     | 5.76     | 5.87     | 179.1    | 5.56    | 0.09   | 1.03 | 0.98 | 0.97 | 1.07 |

Figure S2: EDX spectrum of (a) undoped, (b) 6% Co doped MoS<sub>2</sub> nanosheets.

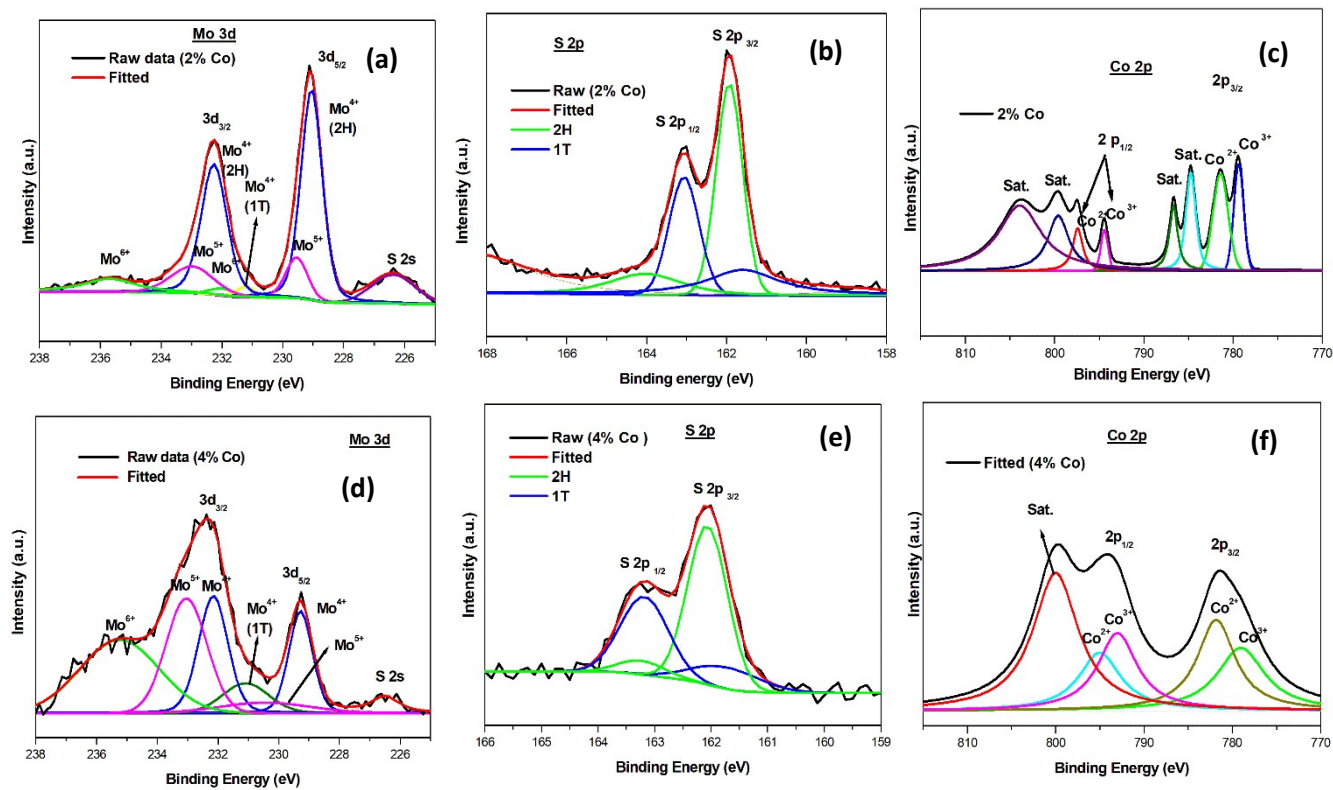

Figure S3: XPS narrow scan spectra of Mo 3d (a), (d) and S 2p (b), (e), for 2% Co and 4% Co doped MoS<sub>2</sub>. Narrow scan spectra of Co 2p (c), (f) of 2% and 4% Co doped MoS<sub>2</sub>.
